# Supplementary material for: Differential engagement of Tim-1 during activation can positively or negatively costimulate T cell expansion and effector function
Source: PubMed Central journal article supplement — J Exp Med. 2007 Jul 9;204(7):1691–702. doi: 10.1084/jem.20062498 (PMC2118637; doi:10.1084/jem.20062498), 2007-07-09
Supplement: jexpmed_jem.20062498_3.pdf [file jexpmed_jem.20062498_3.pdf]

Xiao et al., <http://www.jem.org/cgi/content/full/jem.20062498/DC1>

#### SUPPLEMENTAL MATERIALS AND METHODS

##### **Proliferation assays and cytokine intracellular staining**

Female SJL mice were immunized with PLP<sub>139-151</sub>/CFA. On day 10, spleen cells were isolated and plated in round-bottomed 96-well plates in culture medium with various concentrations of PLP<sub>139-151</sub> plus 10 µg/ml of control Ab, Fab' RMT1-10, or Fab' 3B3. Forty-eight hours later, plates were pulsed for 16 h with 1 µCi [<sup>3</sup>H]-thymidine per well. Proliferation was measured as counts per minute (cpm) by using a Wallac liquid scintillation counter. Spleen cells were also cultured in 24-well plates with PLP<sub>139-151</sub> plus control mAb, 3B3, RMT1-10, or their Fab' fragments for 6 d. Then, cells were purified by Ficoll-Hypaque density gradient centrifugation and reactivated with PMA (20ng/ml) and ionomycin (300ng/ml) and 2mM monensin (GolgiS-top, BD Biosciences) for 4 h at 37°C. After staining with APC-anti-CD4, and 7-AAD, the cells were fixed, permeabilized, and stained with PE-cytokine Ab as recommended by the manufacturer (BD Biosciences). The frequencies of cytokine-producing cells were then analyzed with the programs CELLQUEST and FlowJo by gating on CD4<sup>+</sup>7-AAD<sup>-</sup> populations.
